# Supplementary material
Source: PubMed Central journal article supplement (PMC9483357)

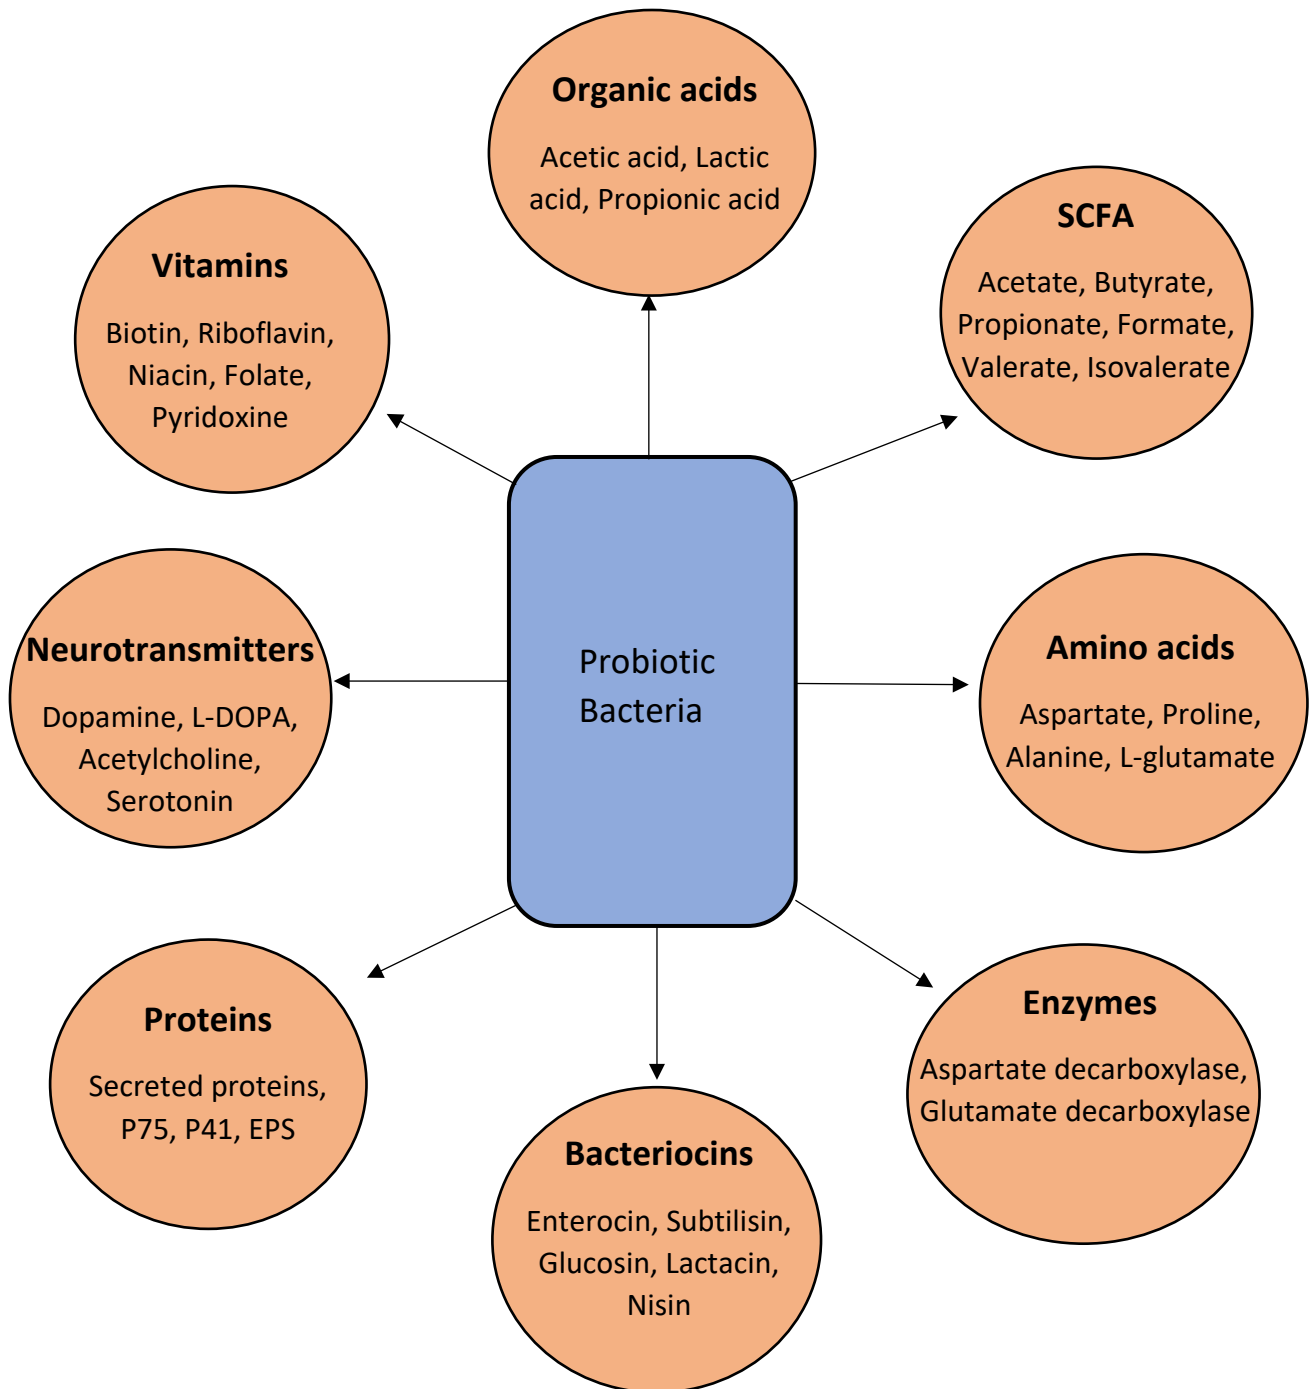

Supplement: 12602_2022_9992_MOESM1_ESM.pdf [file 12602_2022_9992_MOESM1_ESM.pdf]

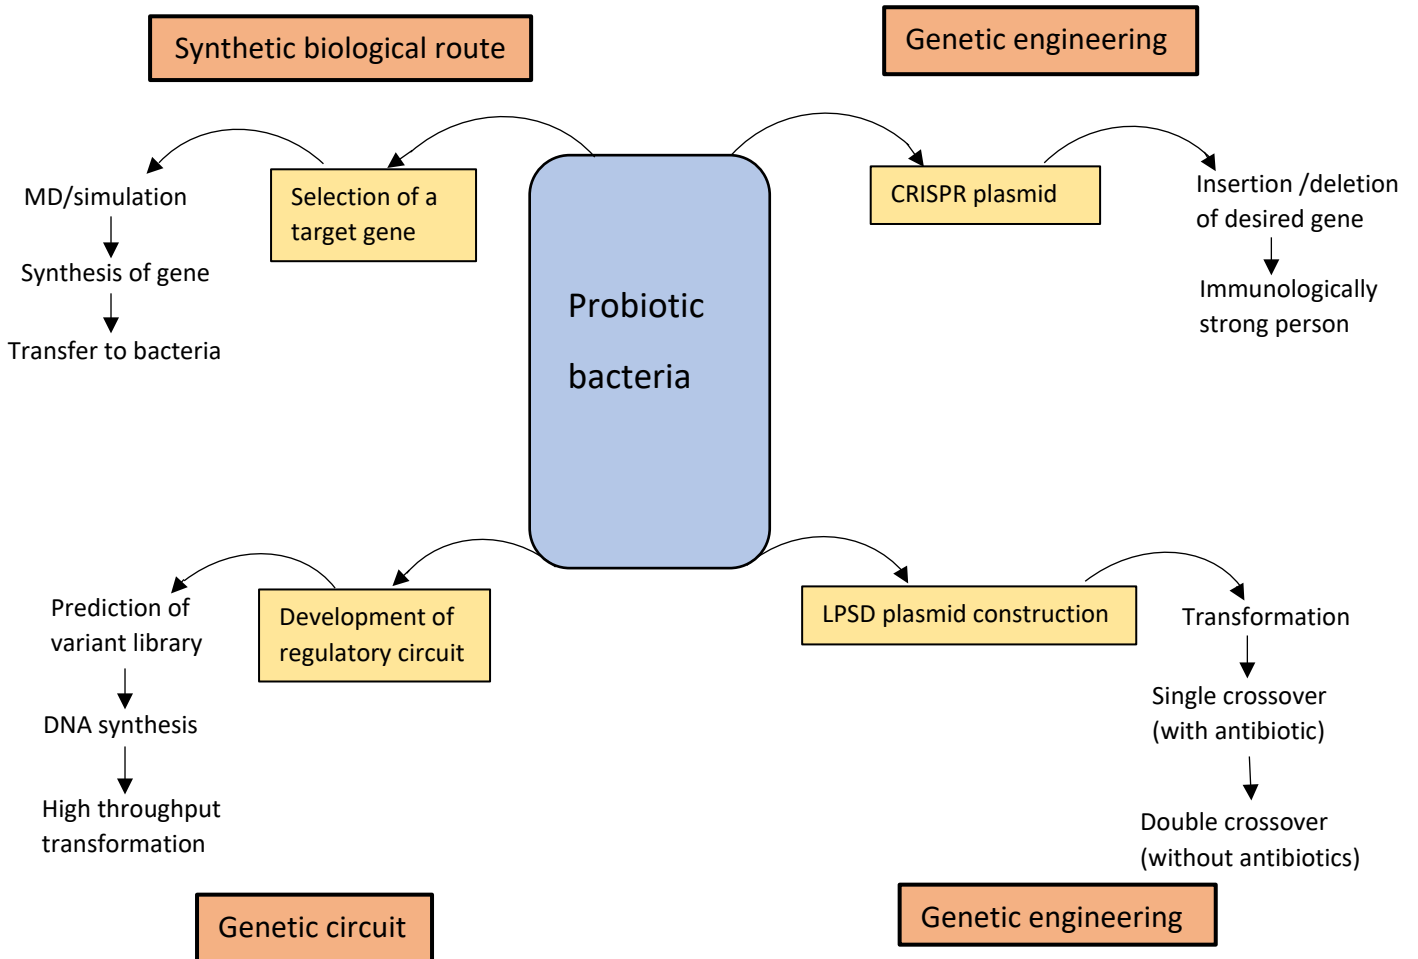

Supplement: 12602_2022_9992_MOESM2_ESM.pdf [file 12602_2022_9992_MOESM2_ESM.pdf]
